# Supplementary material for: A New Approach in Regression Analysis for Modeling Adsorption Isotherms
Source: Hindawi journal article supplement (doi:10.1155/2014/930879), 2014-01-01
Supplement: f1 [file 930879.f1.pdf]

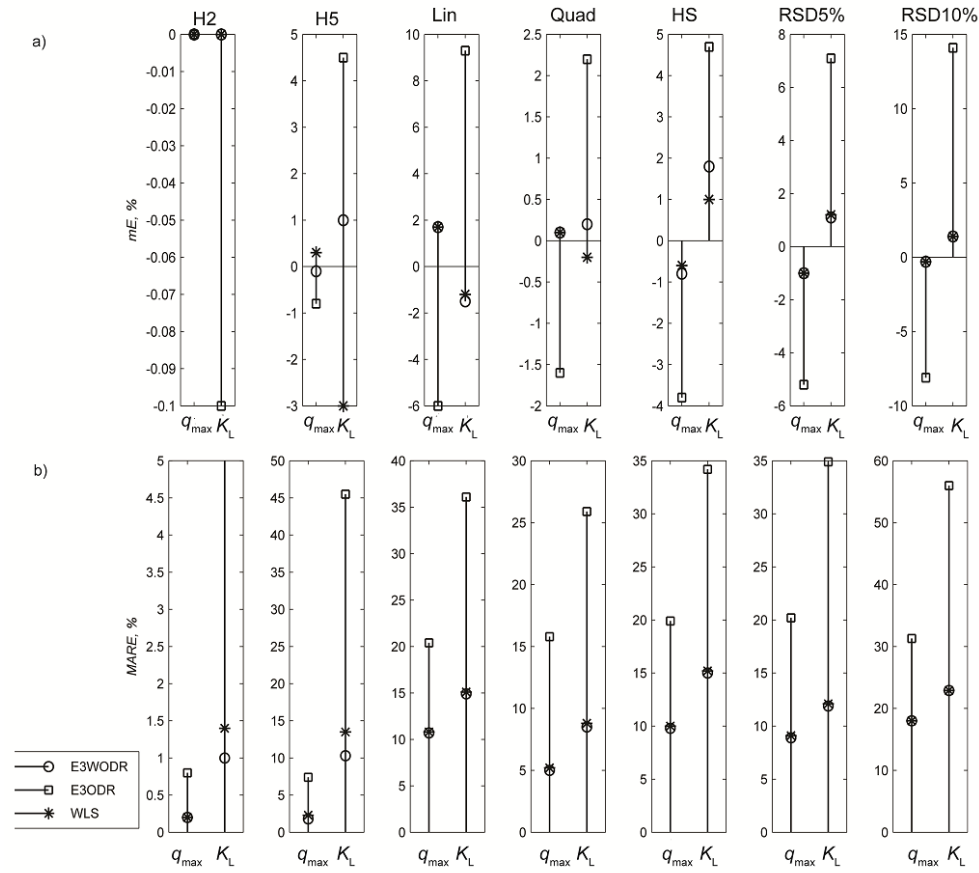

**FIGURE A.1:** Properties of different modeling approaches for determination of parameters in Langmuir isotherm (experiments performed three times), a)  $mE$ , b)  $MARE$ .

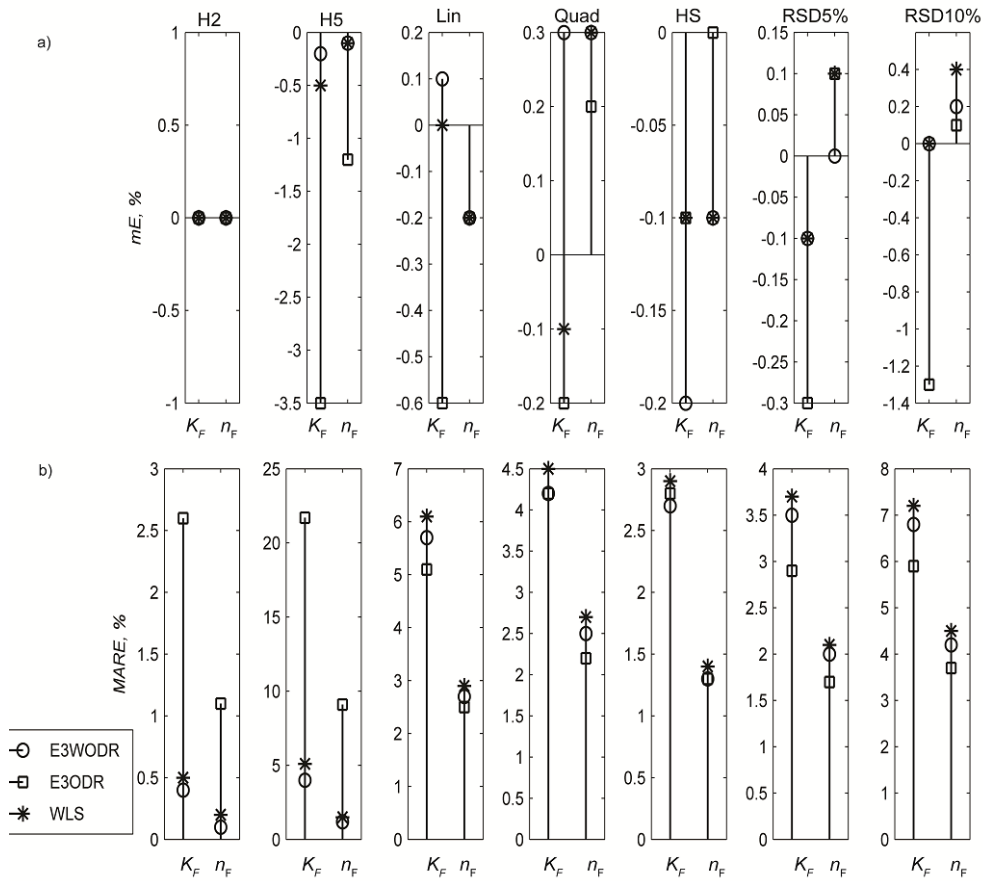

**FIGURE A.2:** Properties of different modeling approaches for determination of parameters in Freundlich isotherm (experiments performed three times), a)  $mE$ , b)  $MARE$

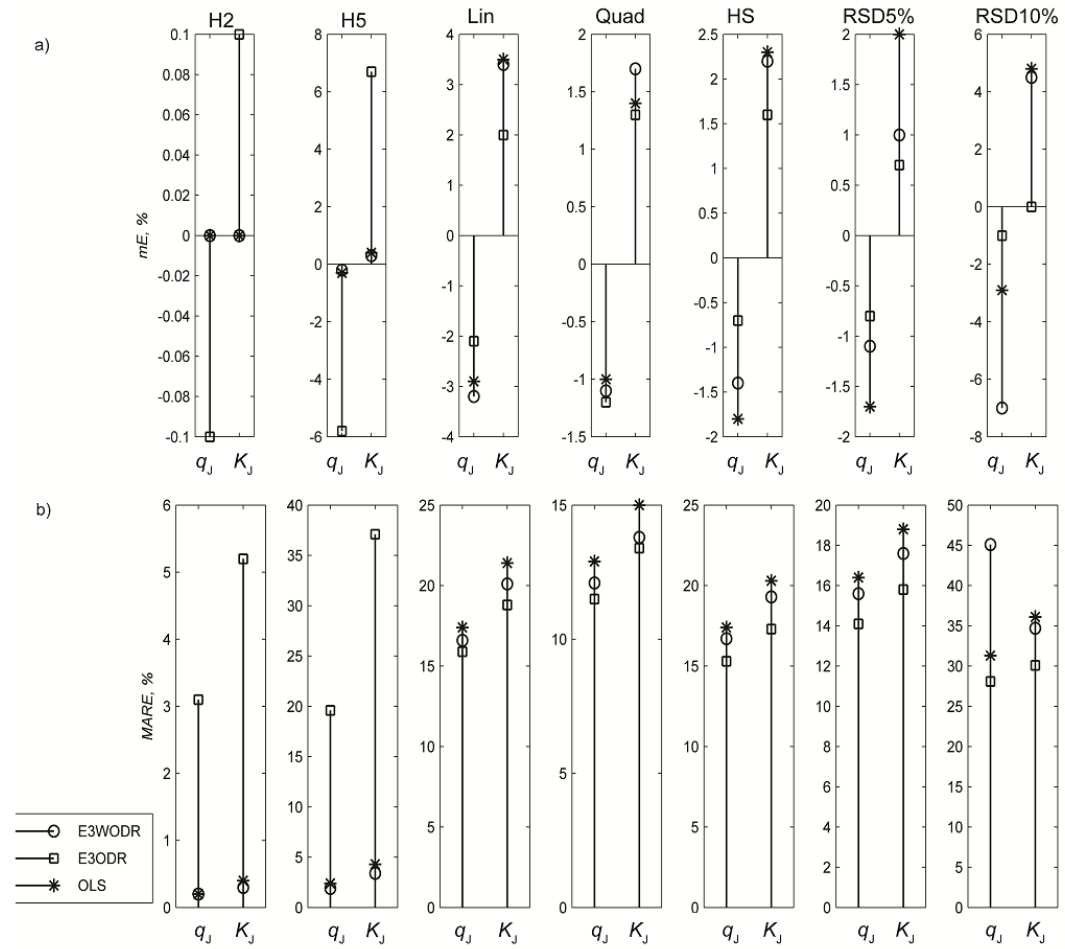

**FIGURE A.3:** Properties of different modeling approaches for determination of parameters in Jovanovic isotherm (experiments performed three times), a)  $mE$ , b)  $MARE$

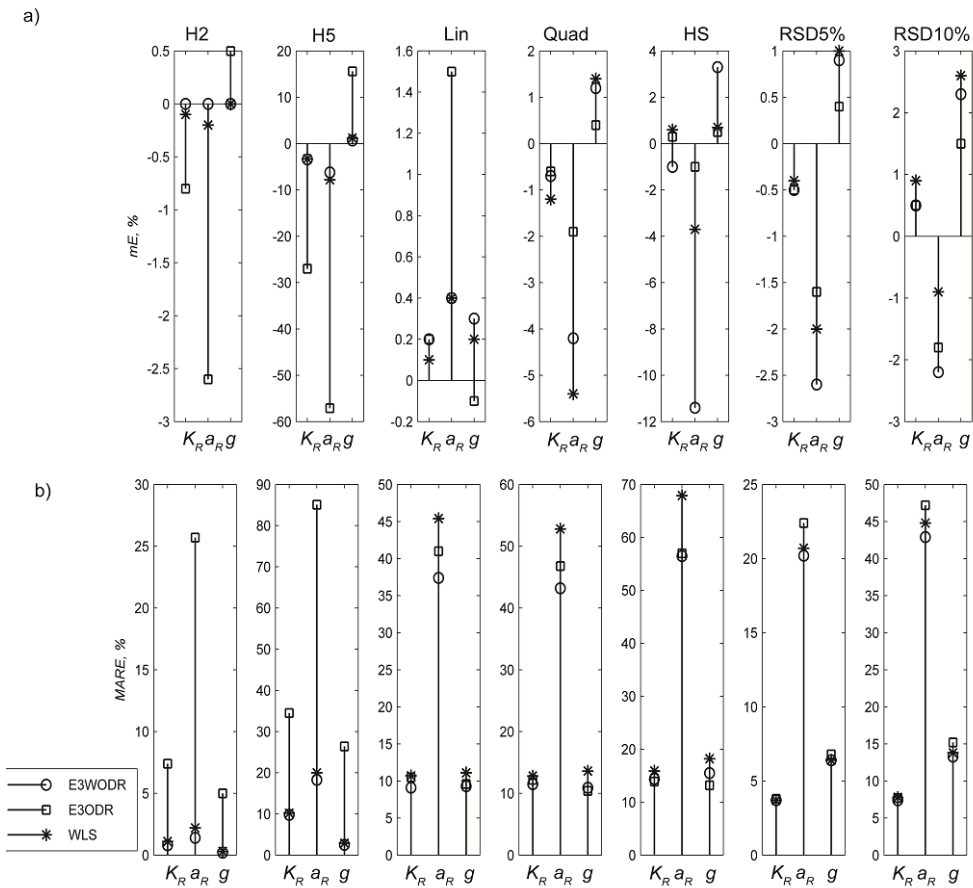

**FIGURE A.4:** Properties of different modeling approaches for determination of parameters in Redlich-Peterson isotherm (experiments performed three times), a)  $mE$ , b)  $MARE$

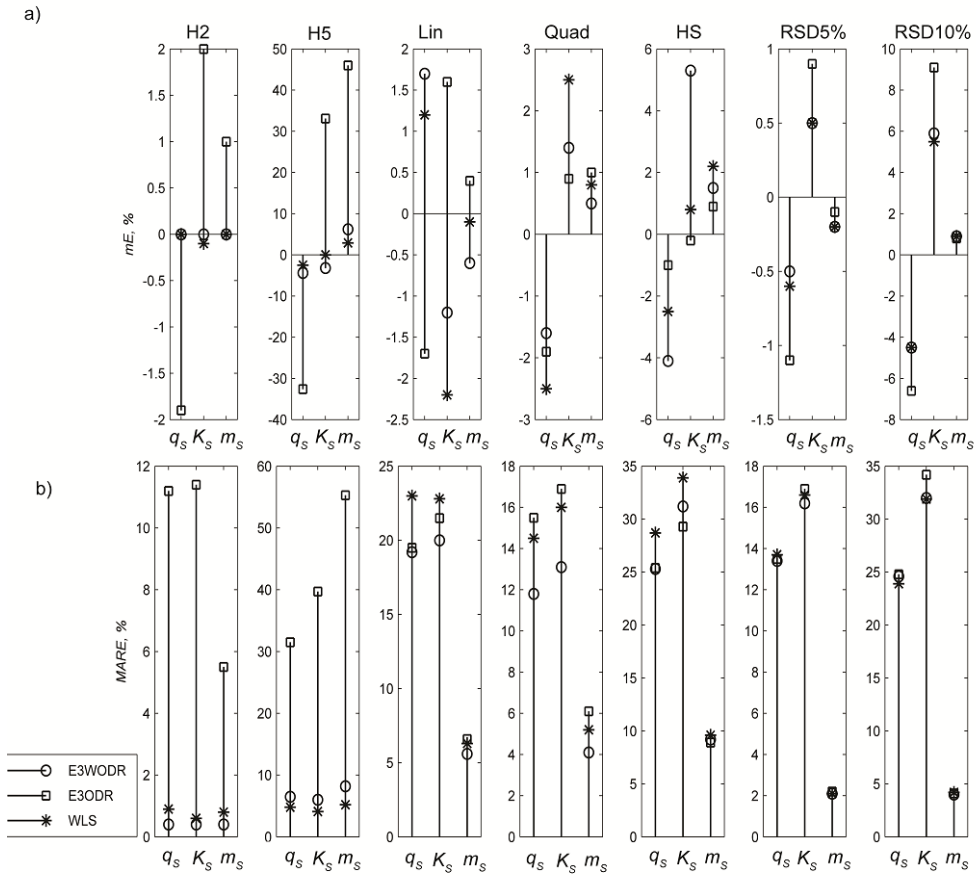

**FIGURE A.5:** Properties of different modeling approaches for determination of parameters in Sips isotherm (experiments performed three times), a) *mE* , b) *MARE*
